# Supplementary material for: A MSTNDel73C mutation with FGF5 knockout sheep by CRISPR/Cas9 promotes skeletal muscle myofiber hyperplasia
Source: eLife journal article supplement (doi:10.7554/elife.86827), 2023-06-23
Supplement: fig3-figsupp1-data2 [file elife-86827-fig3-figsupp1-data2-v1.zip]

— — — — —
