# Supplementary figures and images for: A MSTNDel73C mutation with FGF5 knockout sheep by CRISPR/Cas9 promotes skeletal muscle myofiber hyperplasia
Source: eLife journal article supplement (doi:10.7554/elife.86827), 2023-06-23

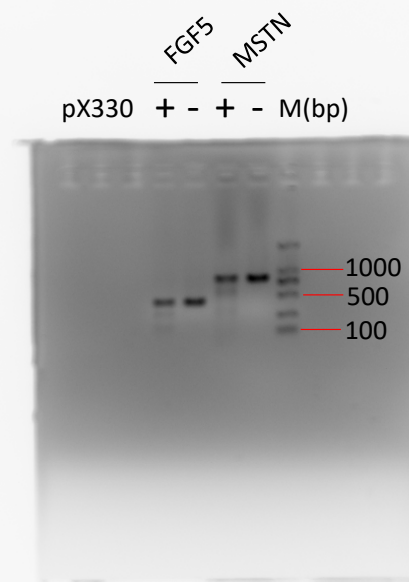

Supplement: fig1-data1 [file elife-86827-fig1-data1-v1.zip]

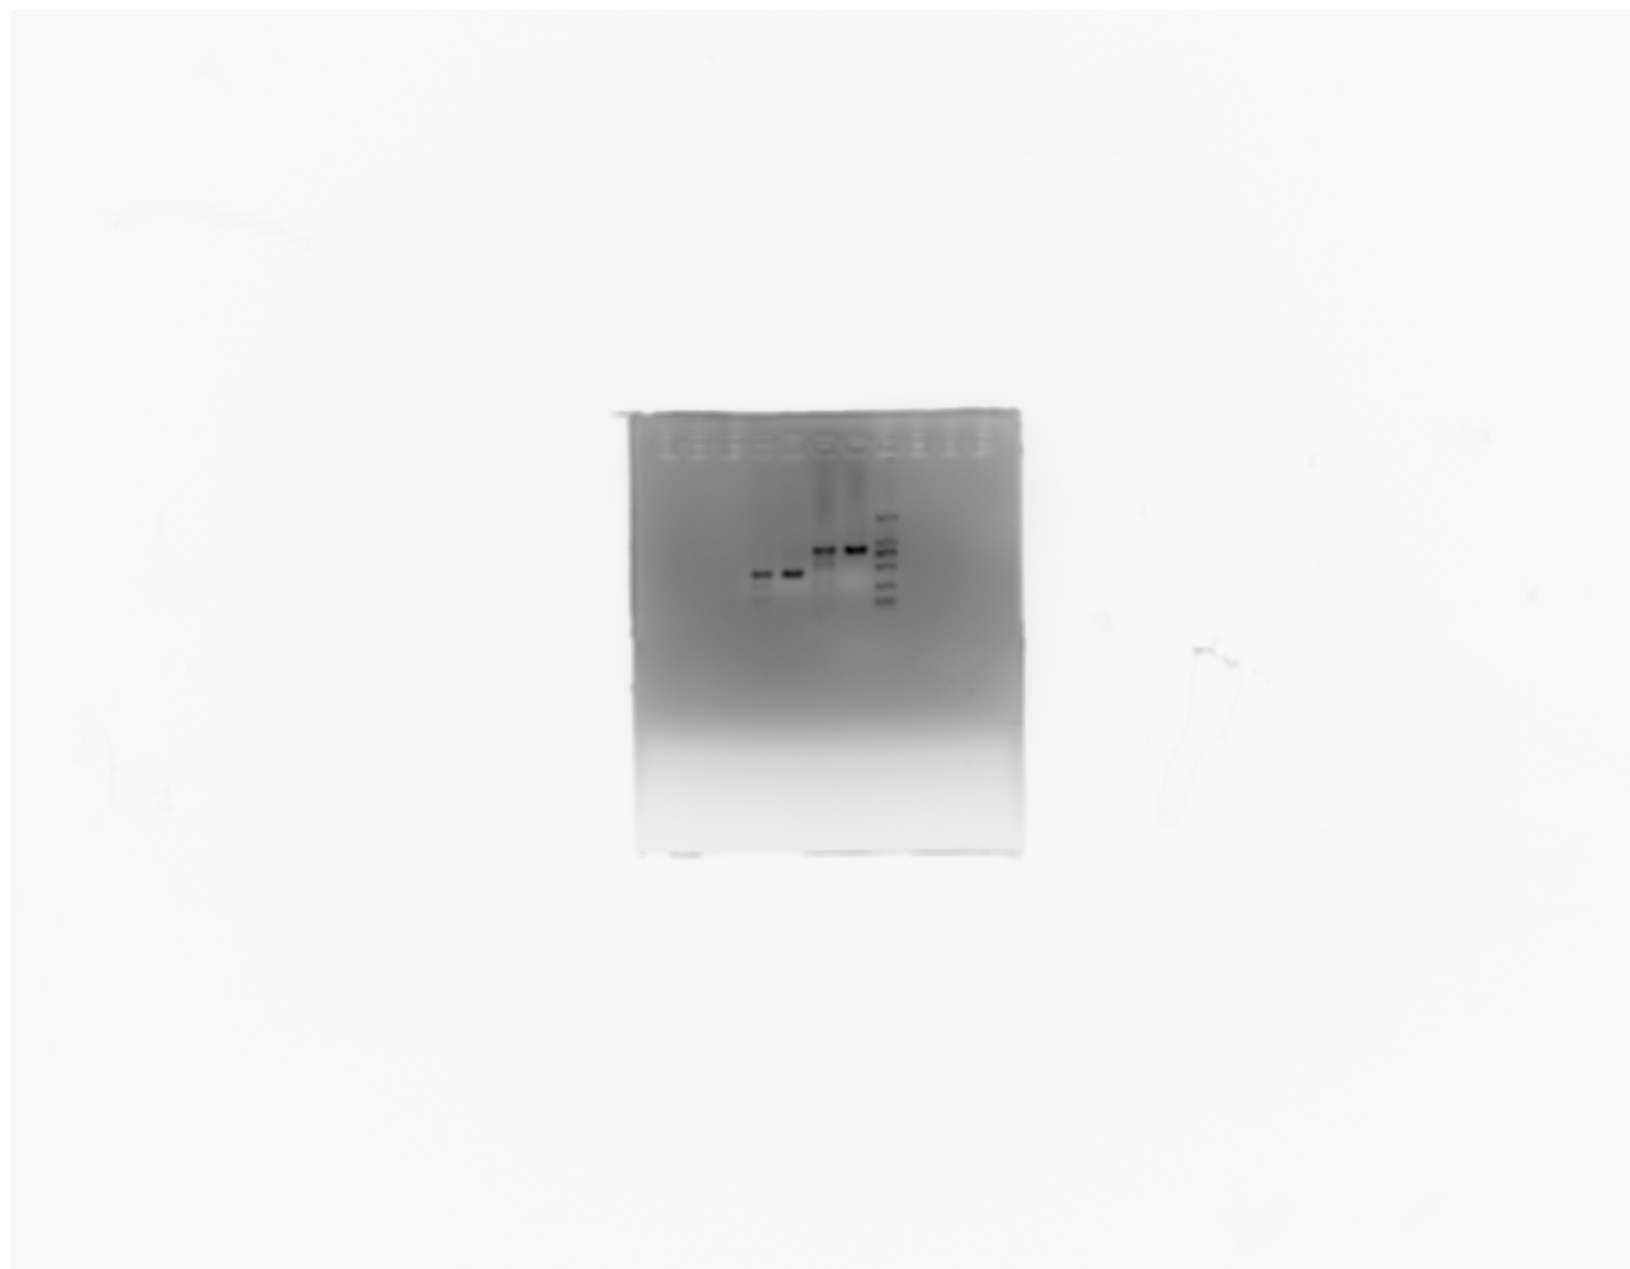

Supplement: fig1-data2 [file elife-86827-fig1-data2-v1.zip]

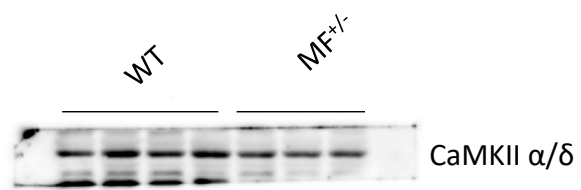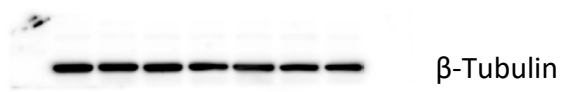

Supplement: fig2-figsupp2-data1 [file elife-86827-fig2-figsupp2-data1-v1.zip]

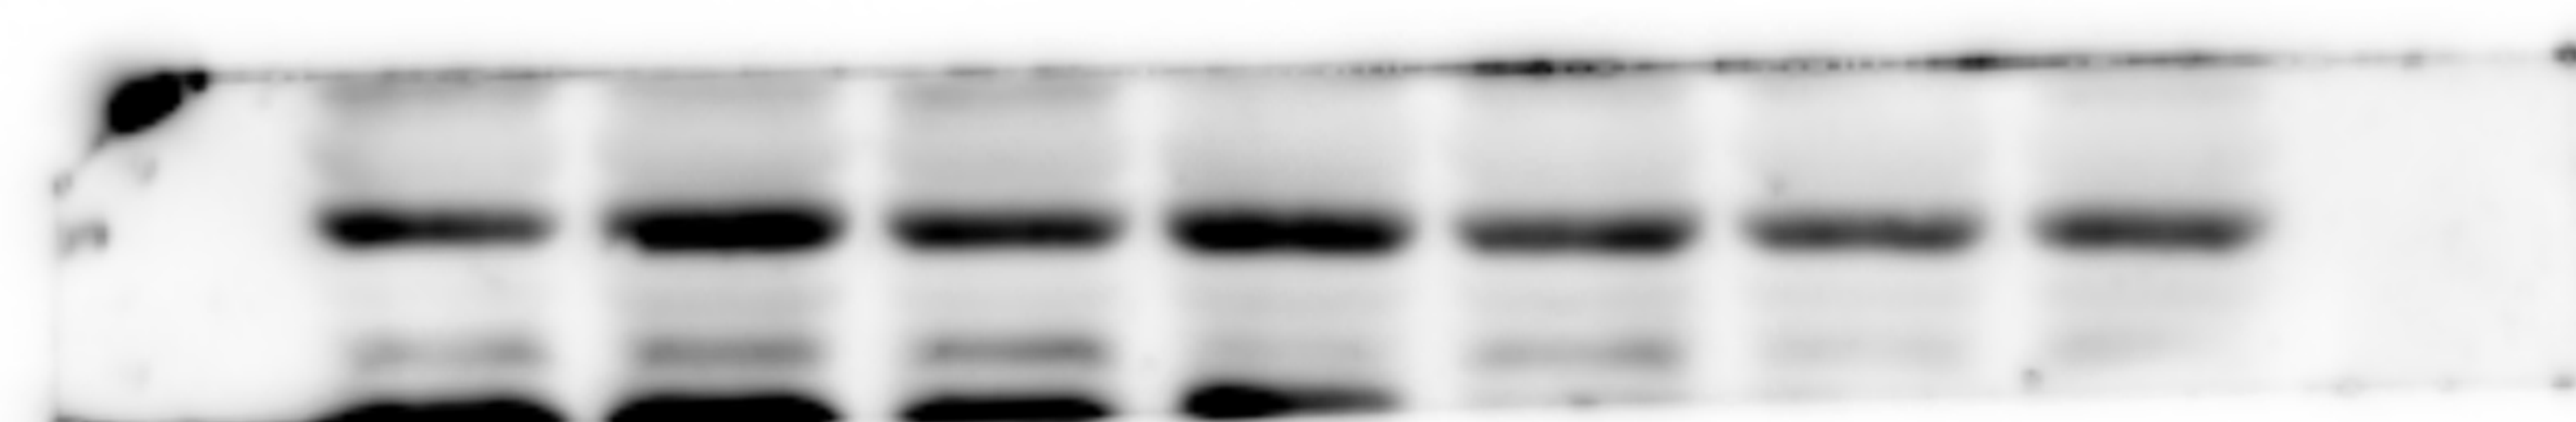

Supplement: fig2-figsupp2-data2 [file elife-86827-fig2-figsupp2-data2-v1.zip]

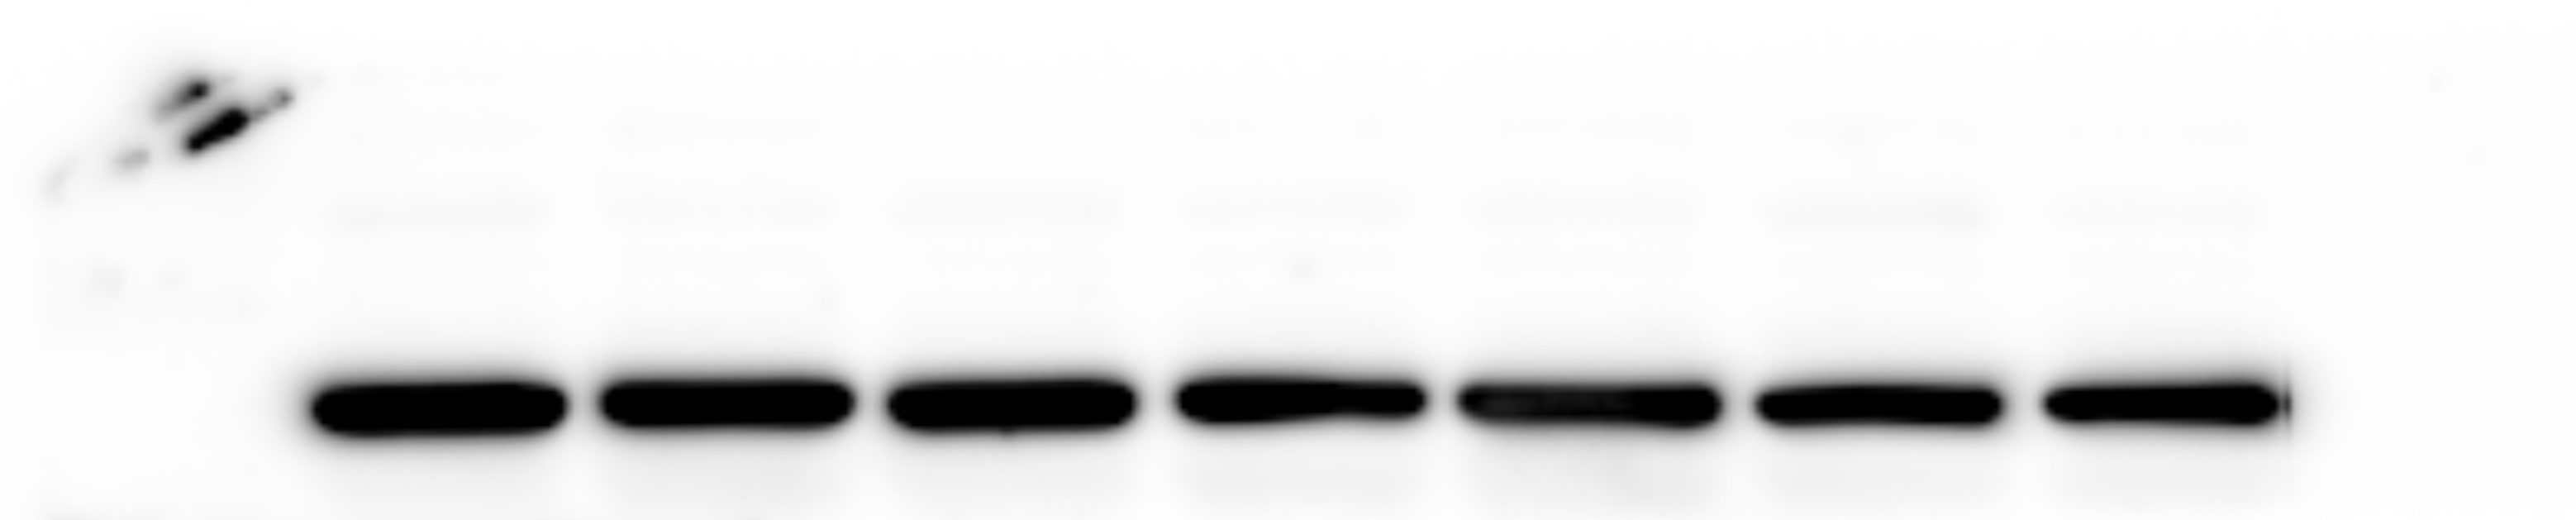

Supplement: fig2-figsupp2-data2 [file elife-86827-fig2-figsupp2-data2-v1.zip]

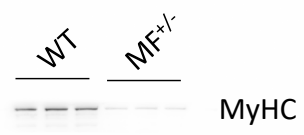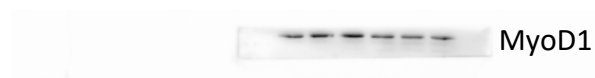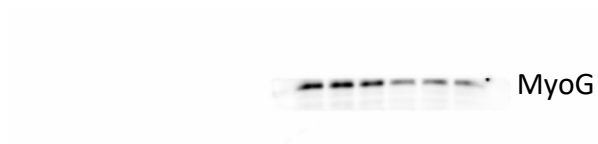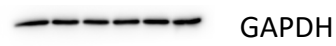

Supplement: fig3-data1 [file elife-86827-fig3-data1-v1.zip]

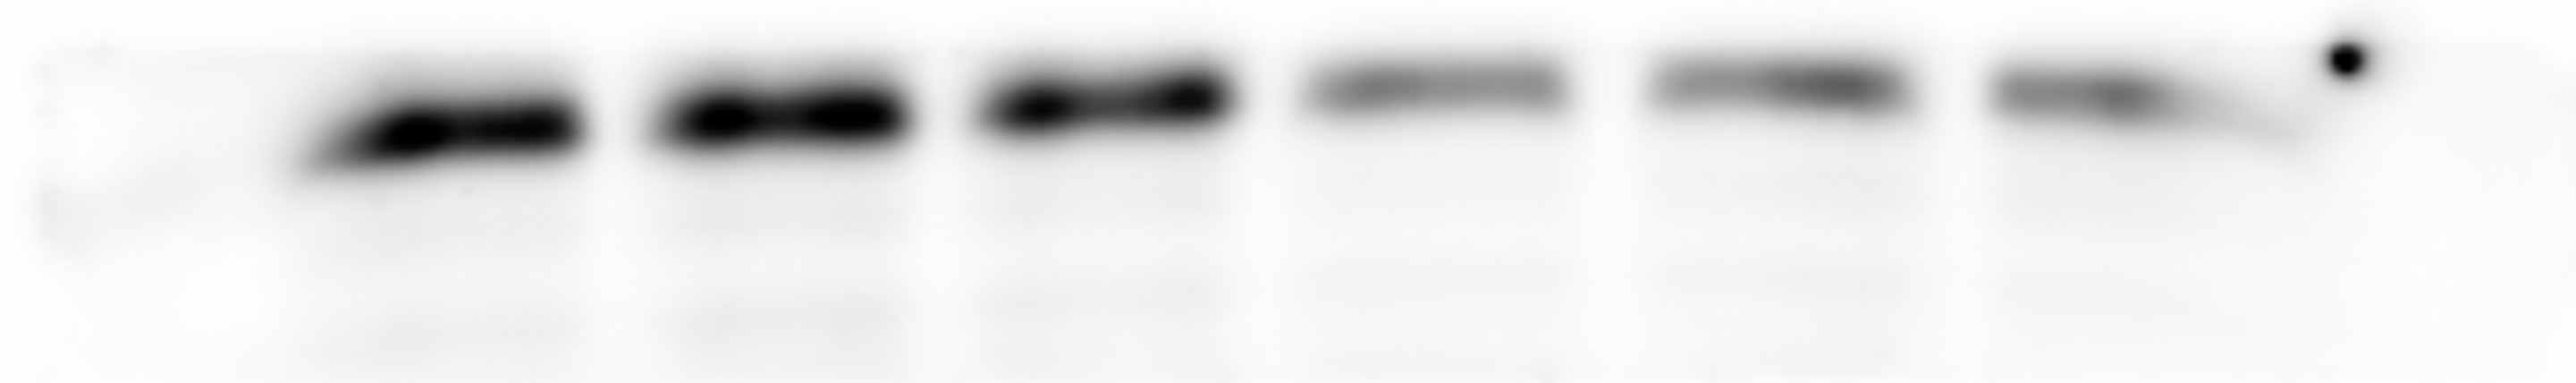

Supplement: fig3-data2 [file elife-86827-fig3-data2-v1.zip]

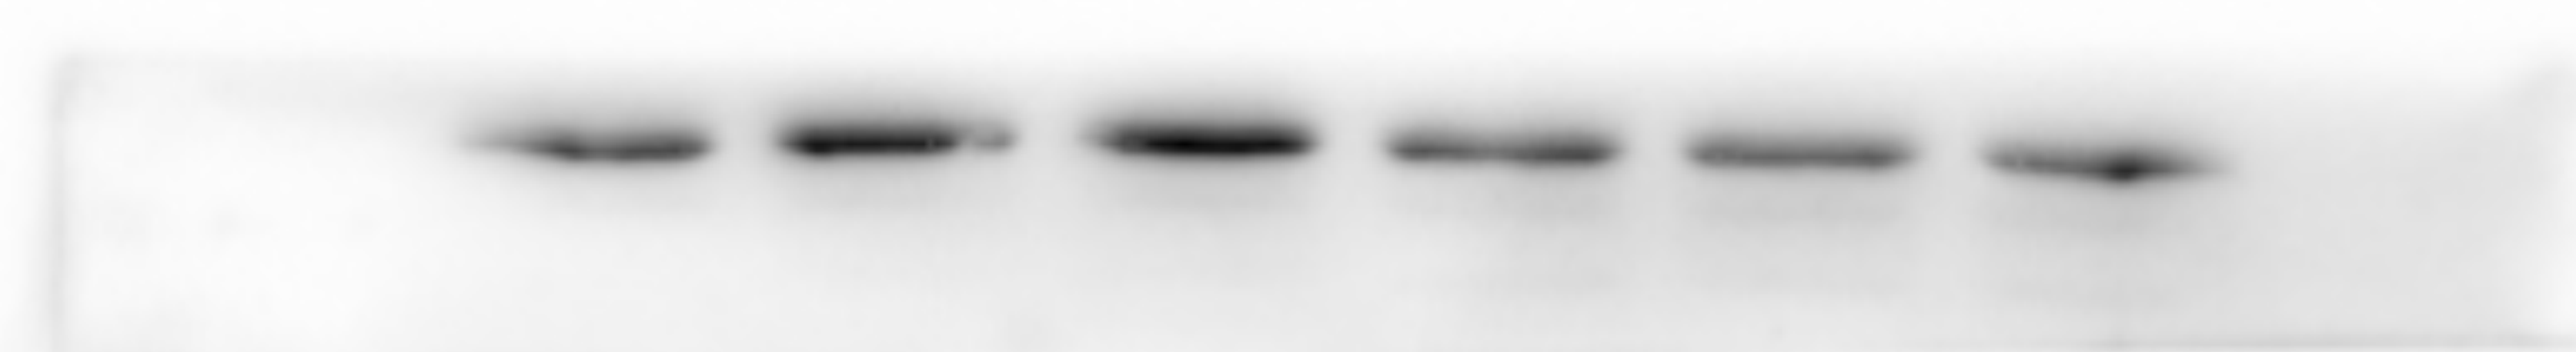

Supplement: fig3-data2 [file elife-86827-fig3-data2-v1.zip]

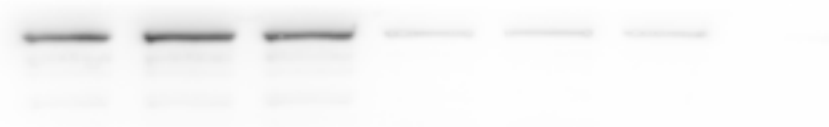

Supplement: fig3-data2 [file elife-86827-fig3-data2-v1.zip]

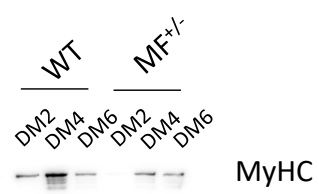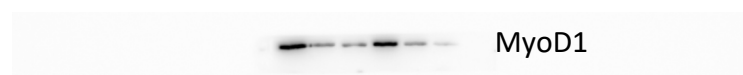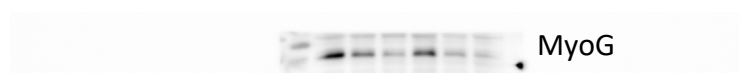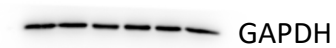

Supplement: fig3-figsupp1-data1 [file elife-86827-fig3-figsupp1-data1-v1.zip]

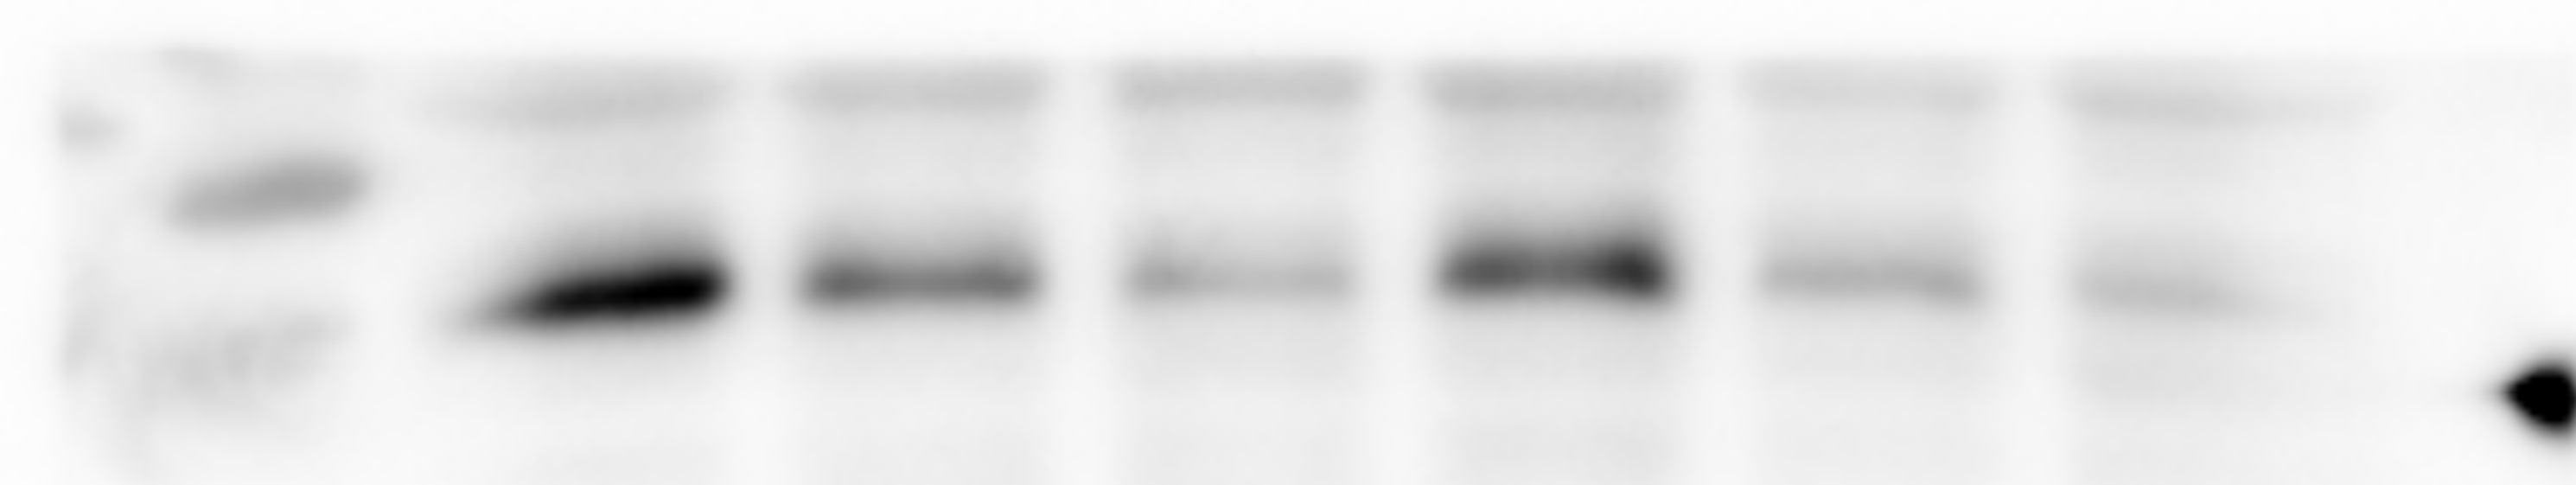

Supplement: fig3-figsupp1-data2 [file elife-86827-fig3-figsupp1-data2-v1.zip]

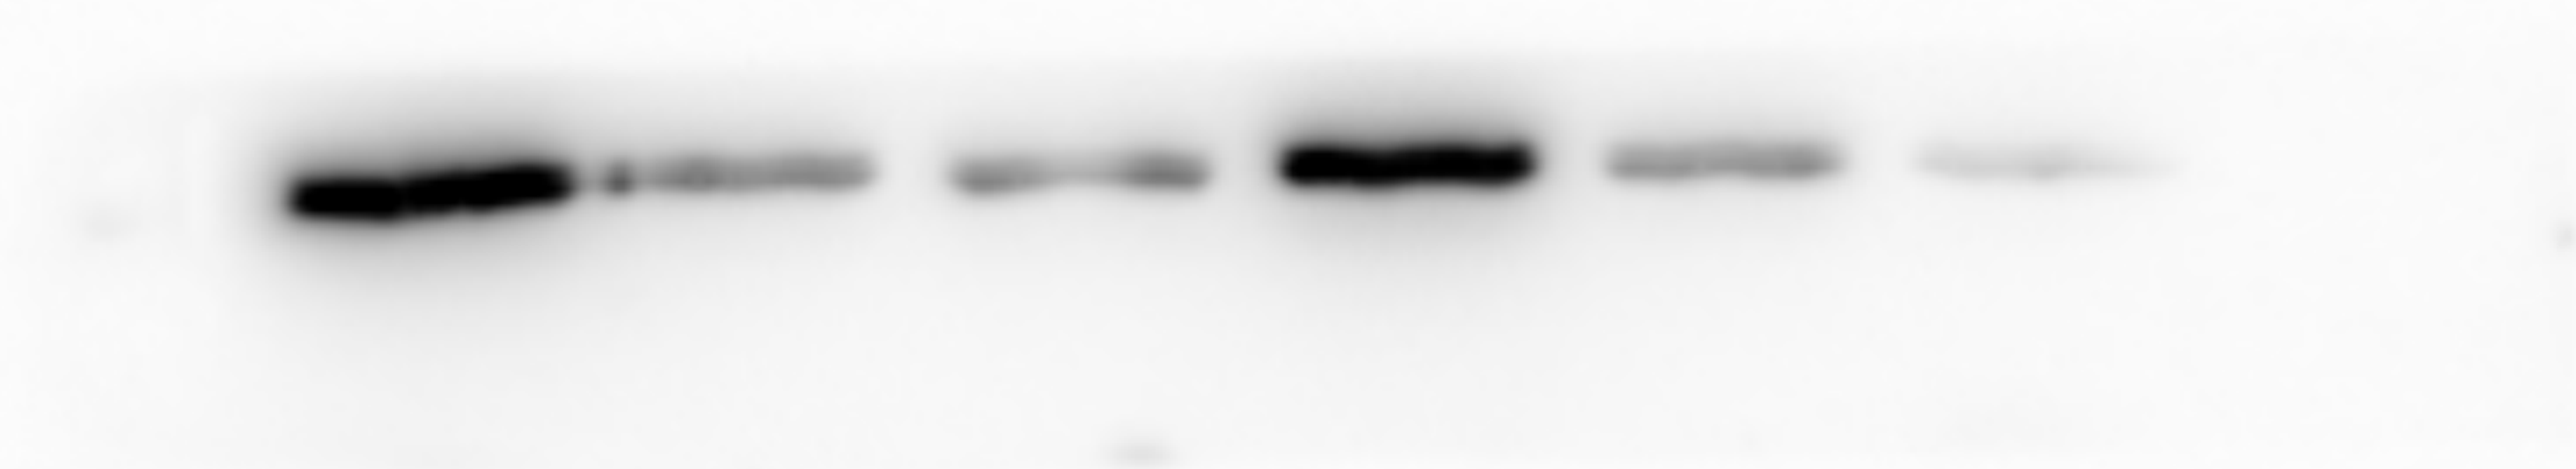

Supplement: fig3-figsupp1-data2 [file elife-86827-fig3-figsupp1-data2-v1.zip]

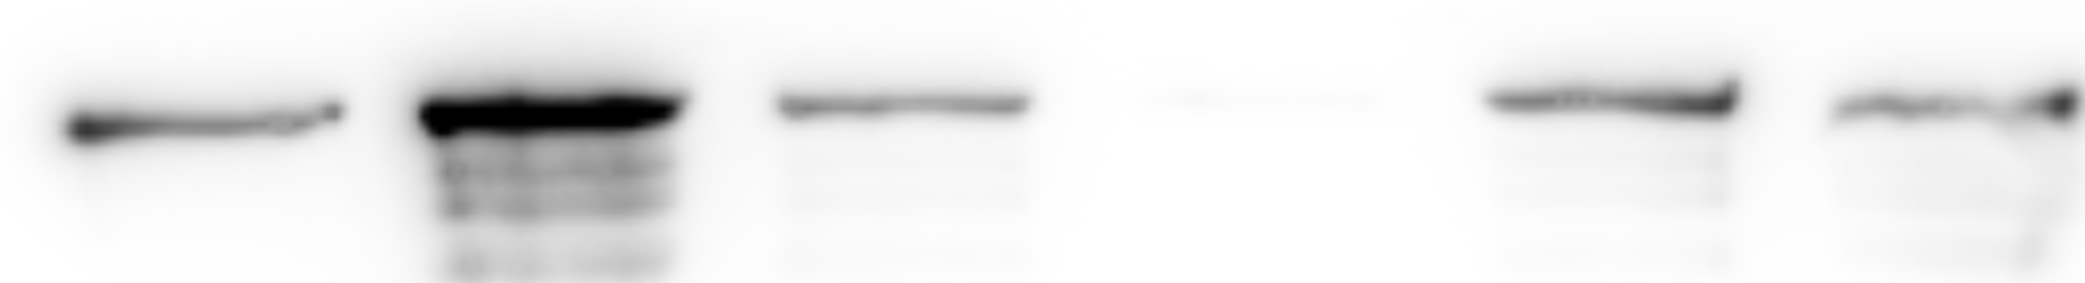

Supplement: fig3-figsupp1-data2 [file elife-86827-fig3-figsupp1-data2-v1.zip]

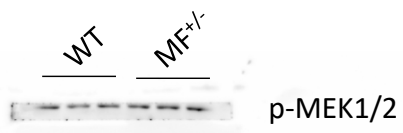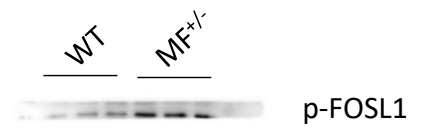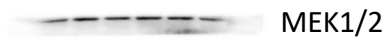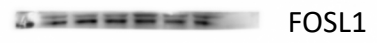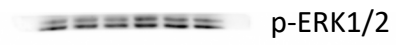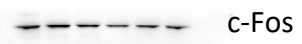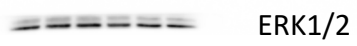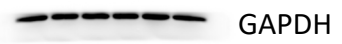

Supplement: fig4-data1 [file elife-86827-fig4-data1-v1.zip]

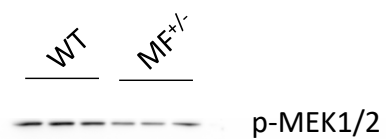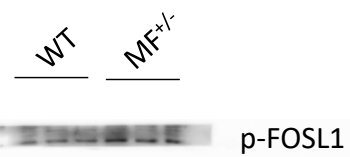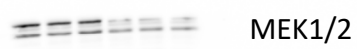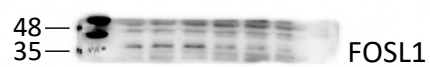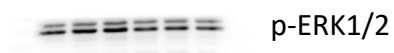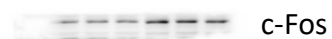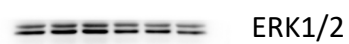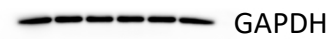

Supplement: fig4-data1 [file elife-86827-fig4-data1-v1.zip]

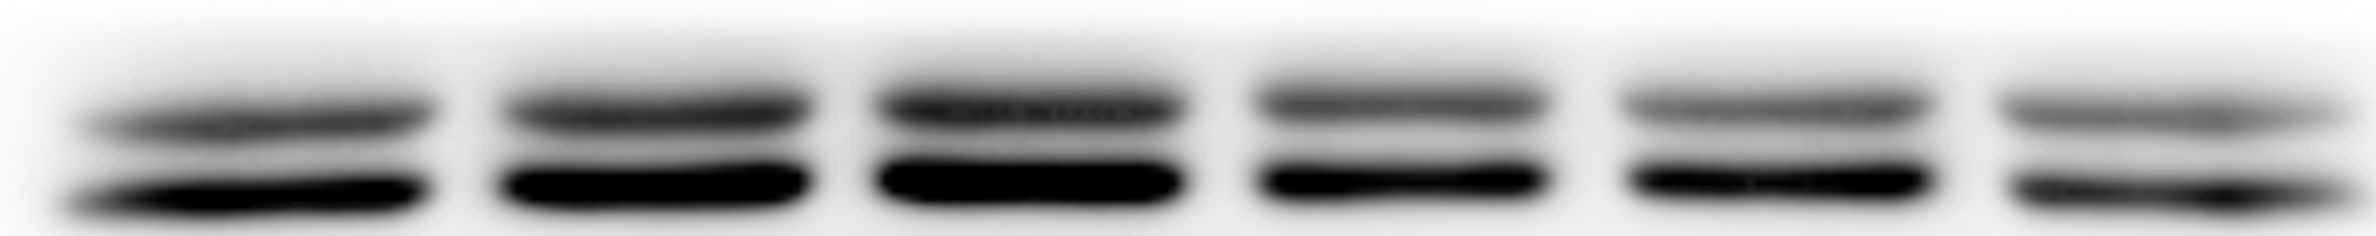

Supplement: fig4-data2 [file elife-86827-fig4-data2-v1.zip]

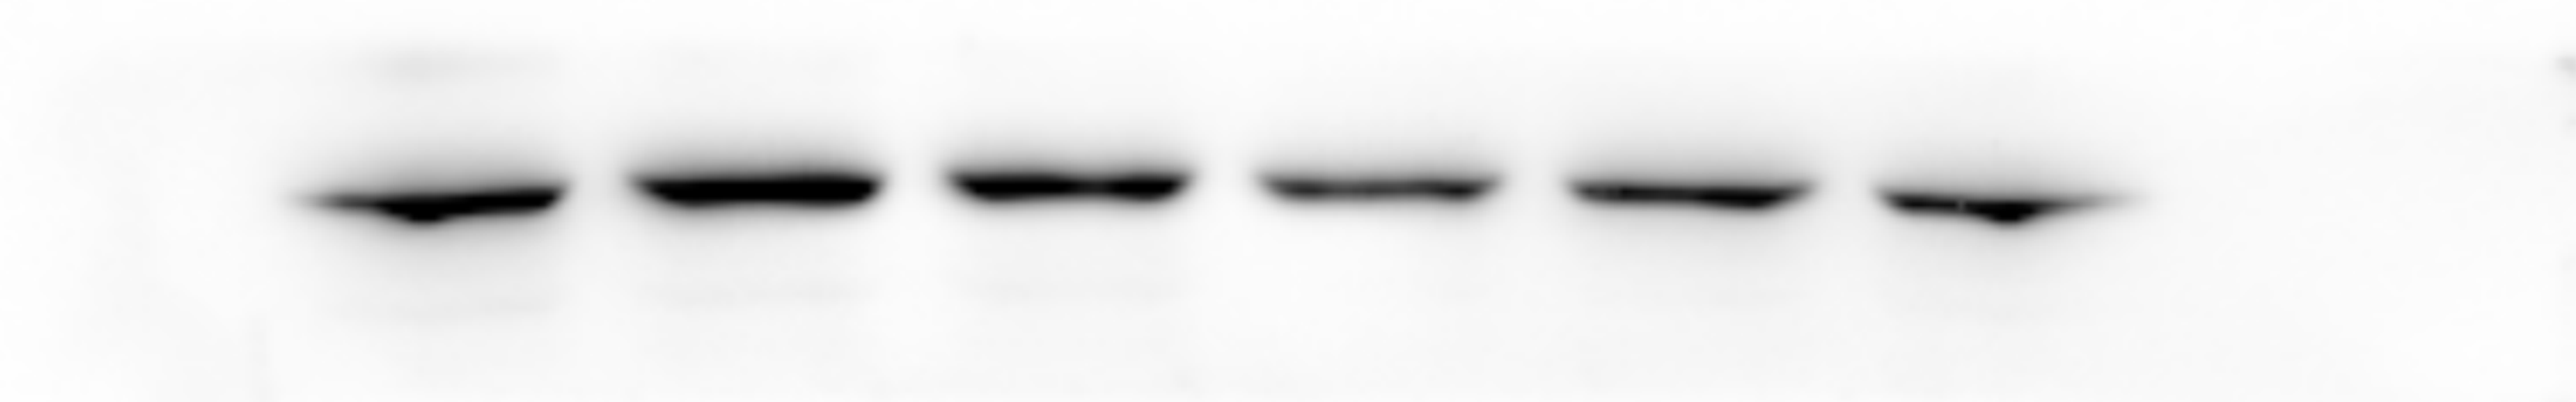

Supplement: fig4-data2 [file elife-86827-fig4-data2-v1.zip]

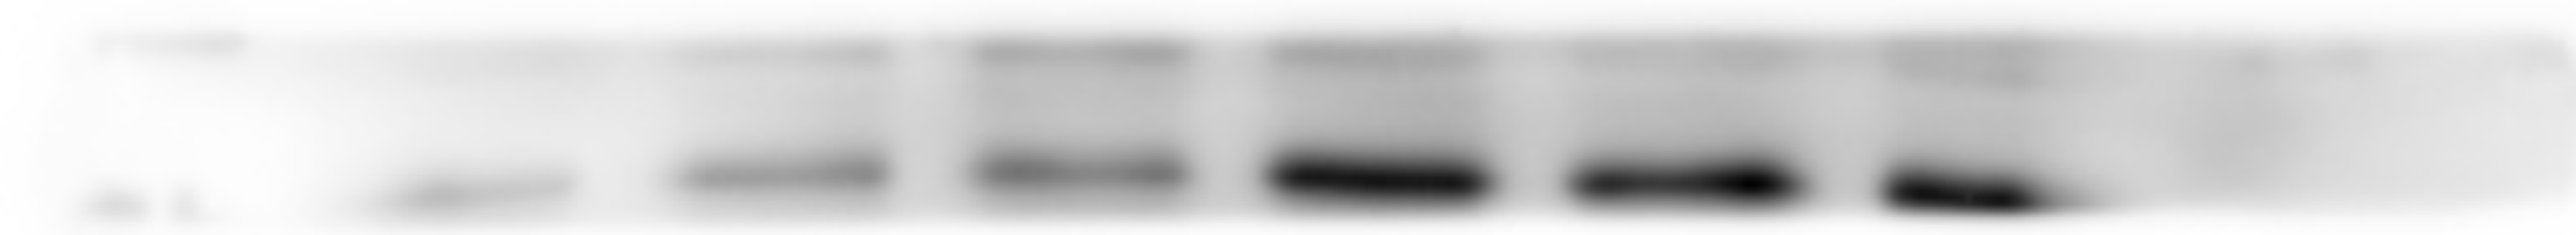

Supplement: fig4-data2 [file elife-86827-fig4-data2-v1.zip]

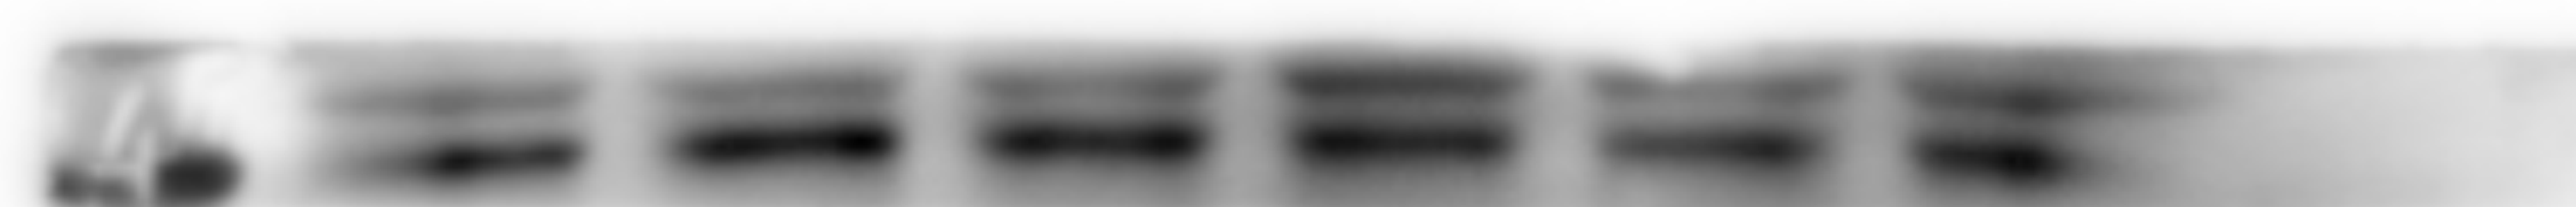

Supplement: fig4-data2 [file elife-86827-fig4-data2-v1.zip]

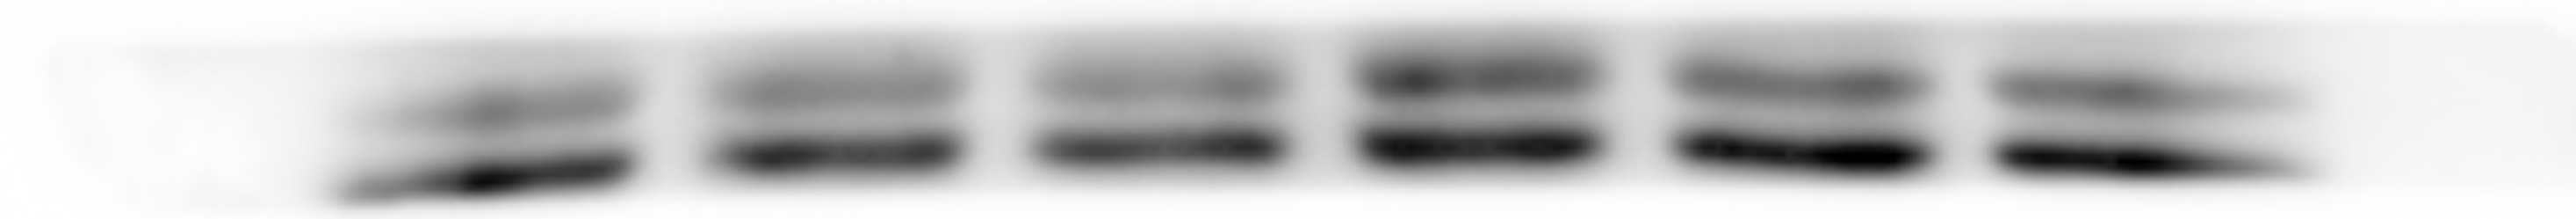

Supplement: fig4-data2 [file elife-86827-fig4-data2-v1.zip]

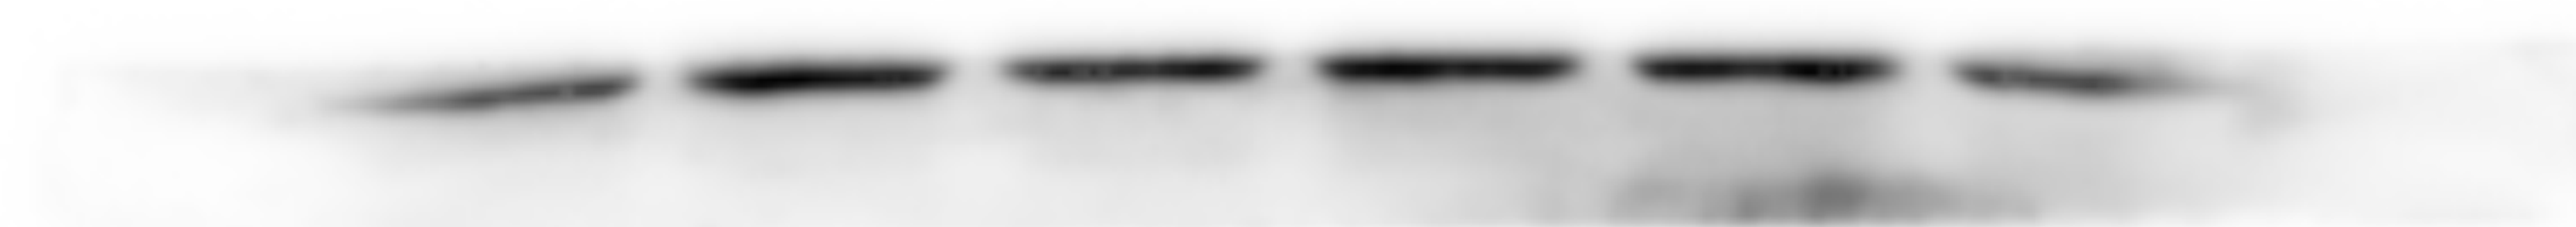

Supplement: fig4-data2 [file elife-86827-fig4-data2-v1.zip]

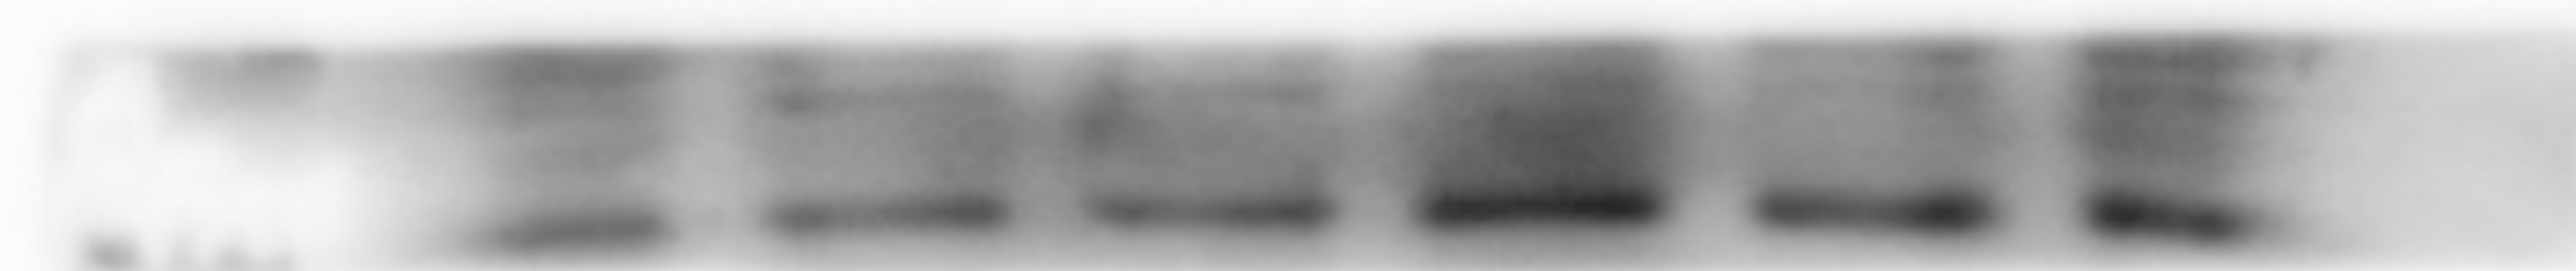

Supplement: fig4-data2 [file elife-86827-fig4-data2-v1.zip]

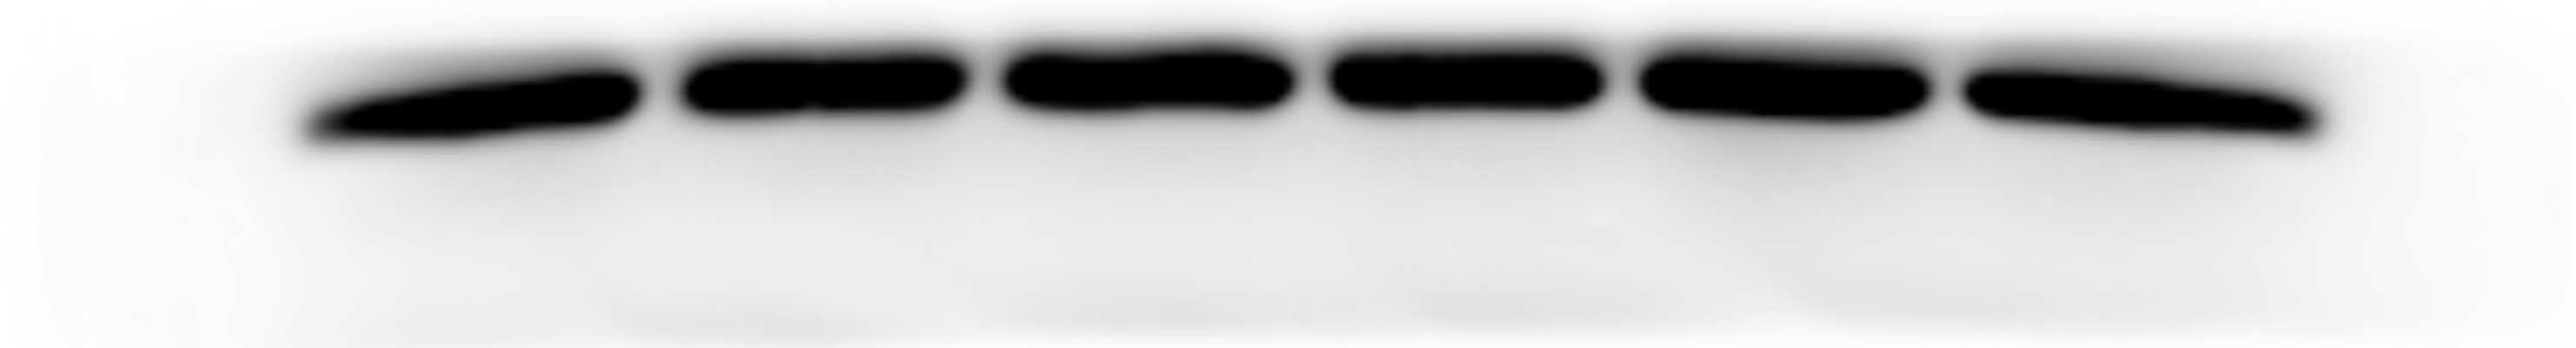

Supplement: fig4-data2 [file elife-86827-fig4-data2-v1.zip]

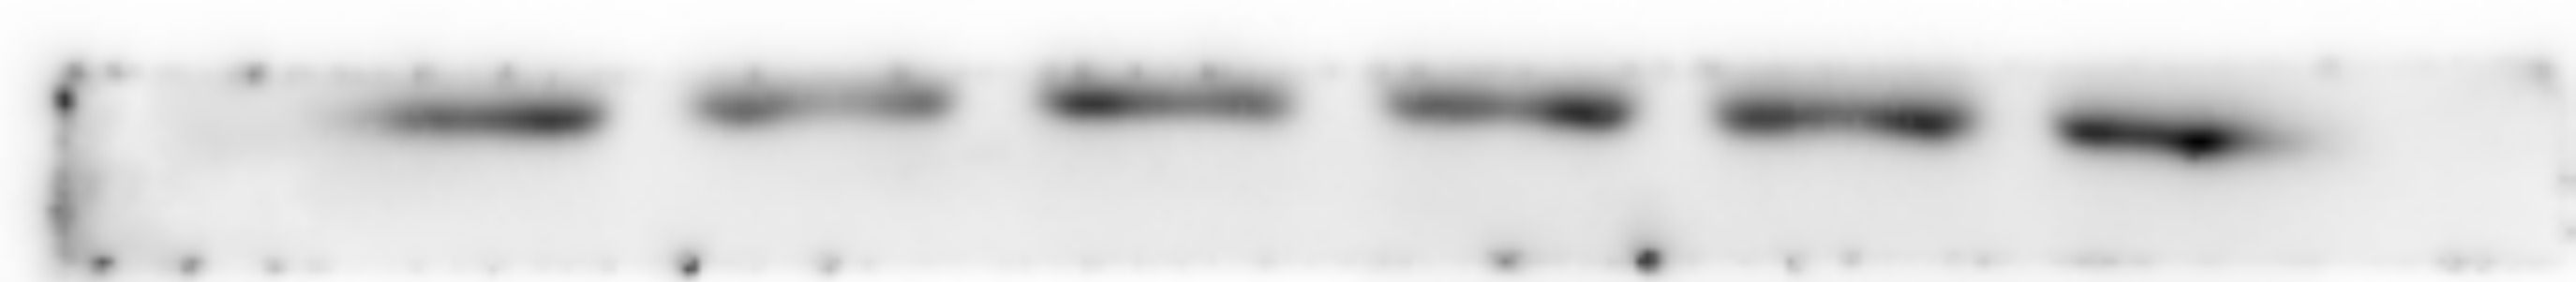

Supplement: fig4-data2 [file elife-86827-fig4-data2-v1.zip]

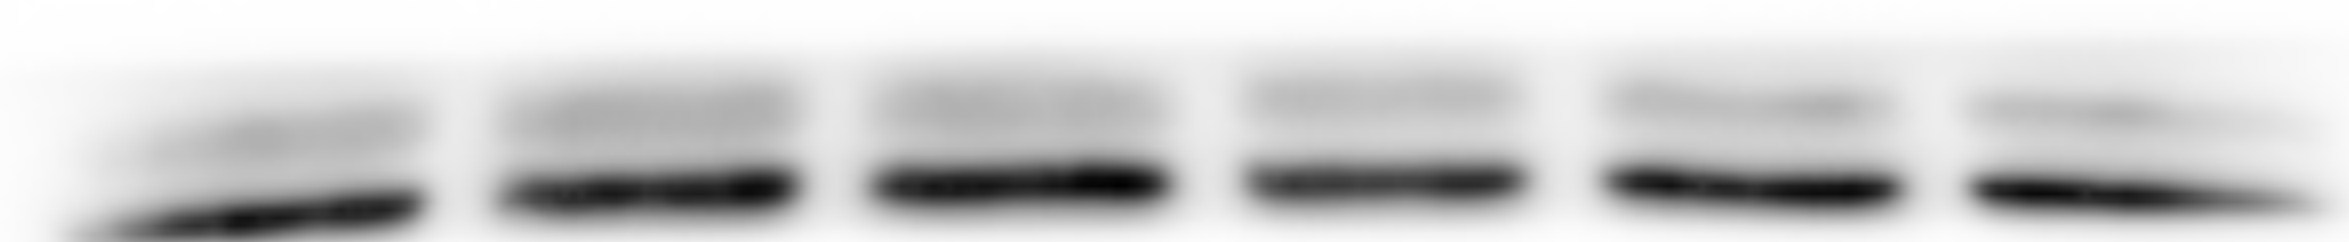

Supplement: fig4-data2 [file elife-86827-fig4-data2-v1.zip]

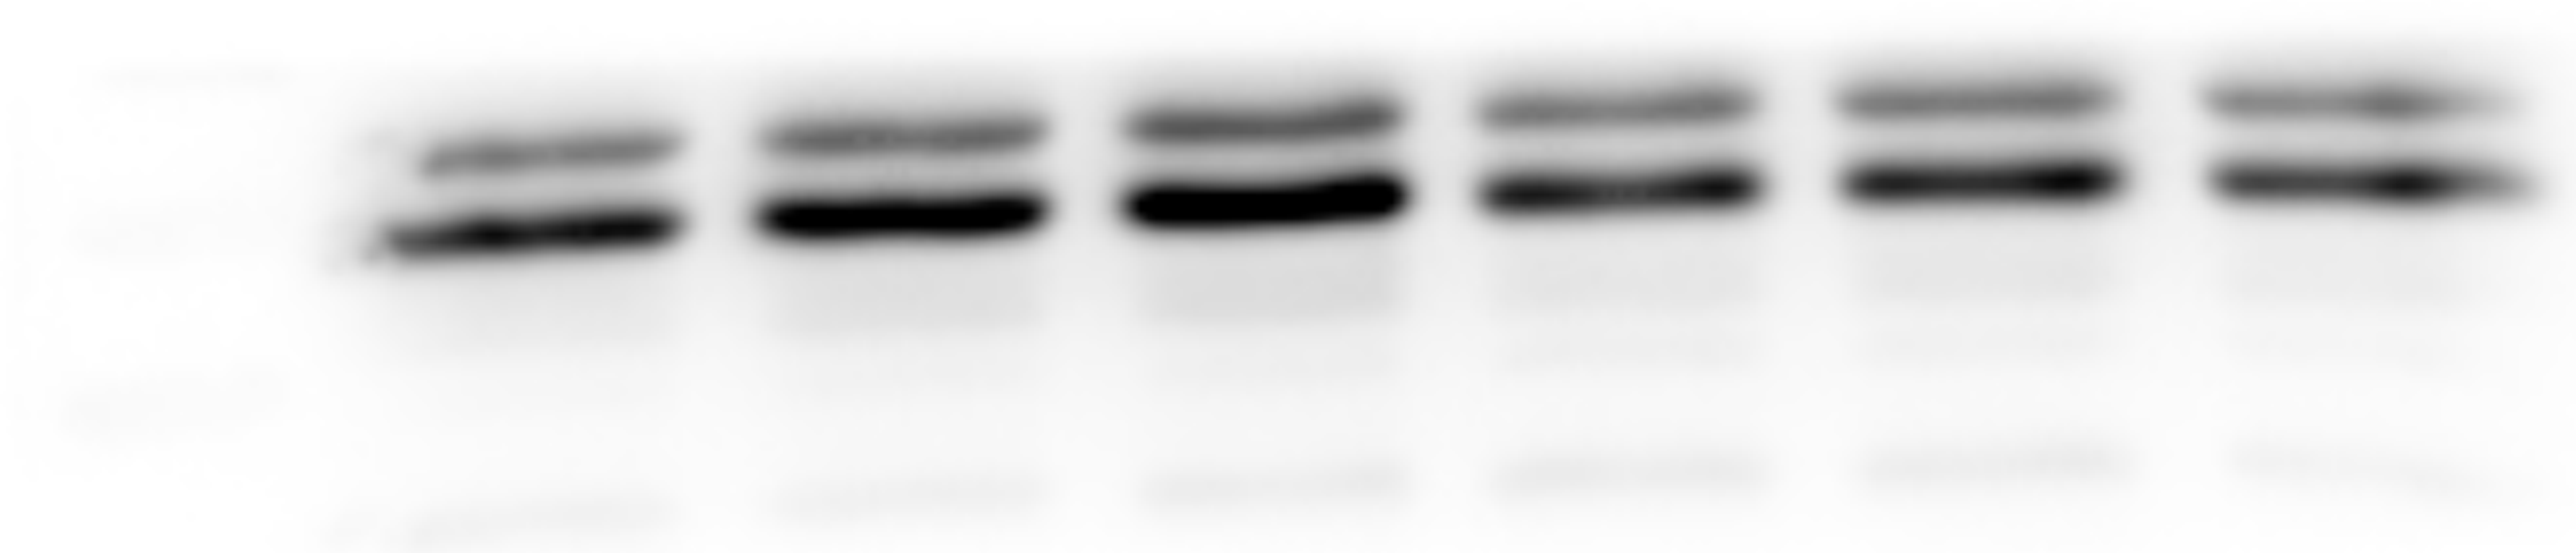

Supplement: fig4-data2 [file elife-86827-fig4-data2-v1.zip]

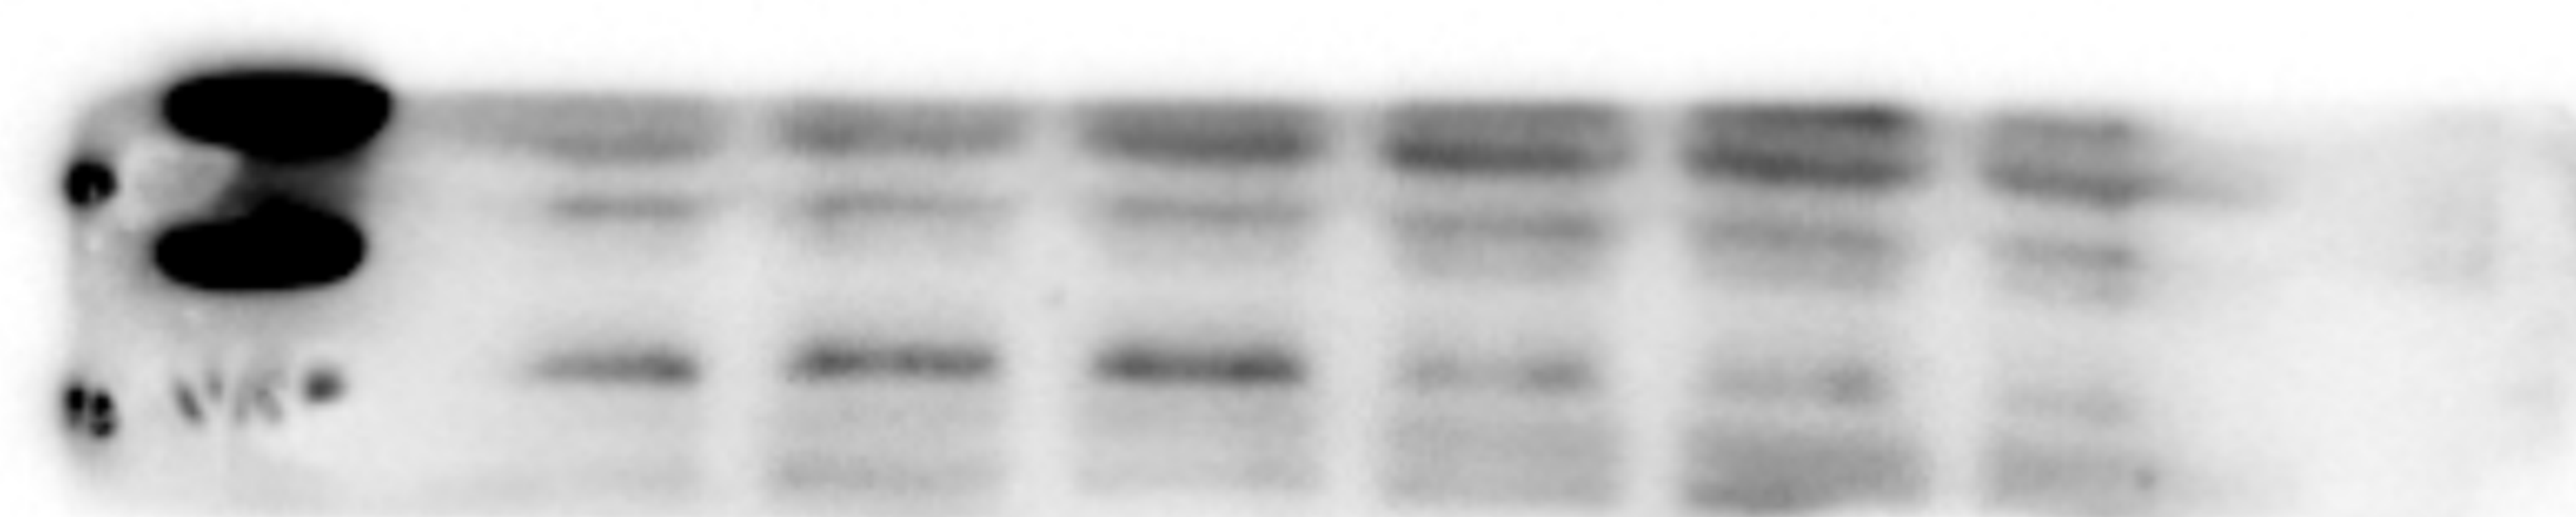

Supplement: fig4-data2 [file elife-86827-fig4-data2-v1.zip]

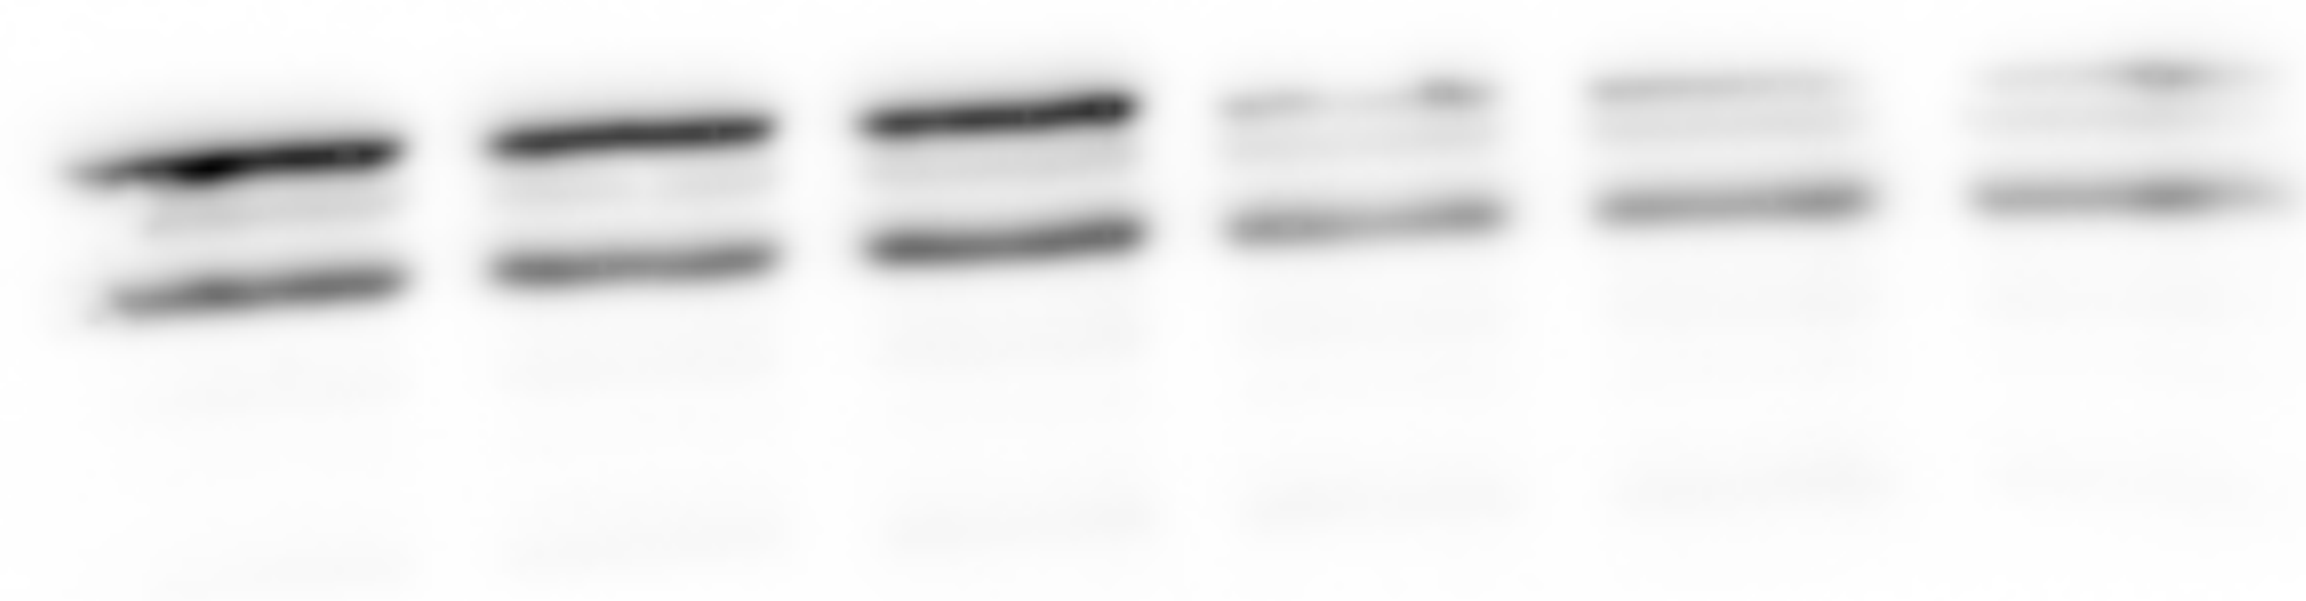

Supplement: fig4-data2 [file elife-86827-fig4-data2-v1.zip]

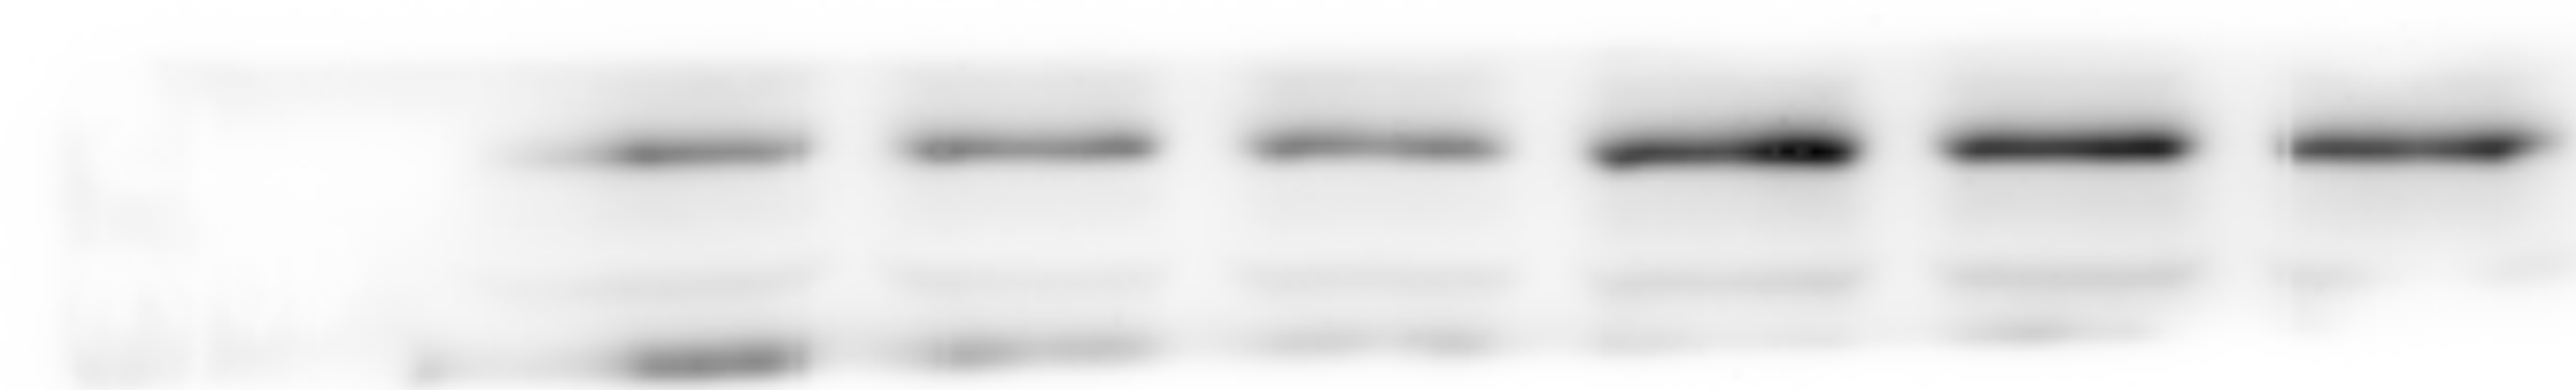

Supplement: fig4-data2 [file elife-86827-fig4-data2-v1.zip]

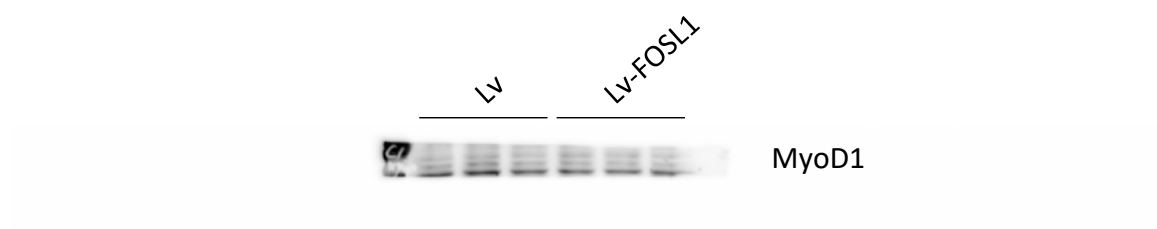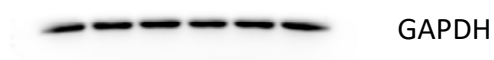

Supplement: fig5-data1 [file elife-86827-fig5-data1-v1.zip]

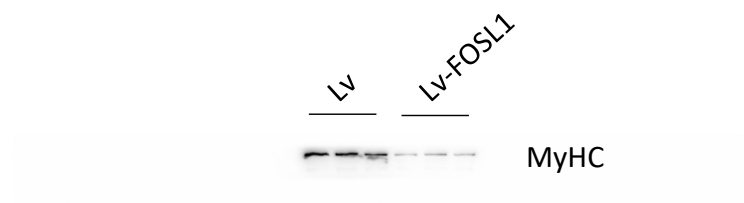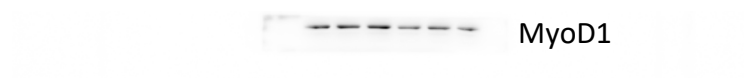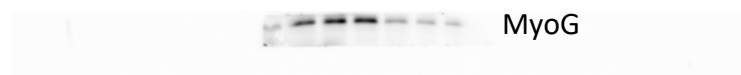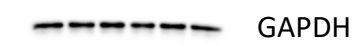

Supplement: fig5-data1 [file elife-86827-fig5-data1-v1.zip]

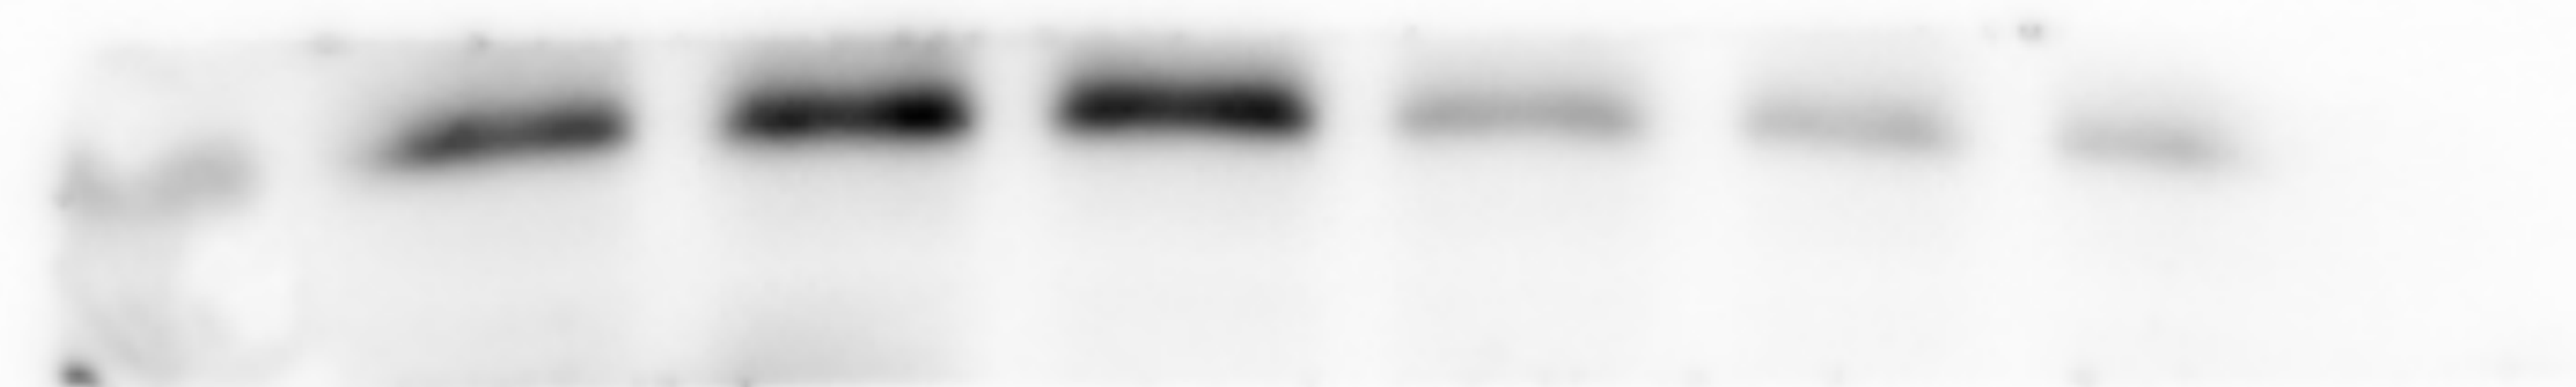

Supplement: fig5-data2 [file elife-86827-fig5-data2-v1.zip]

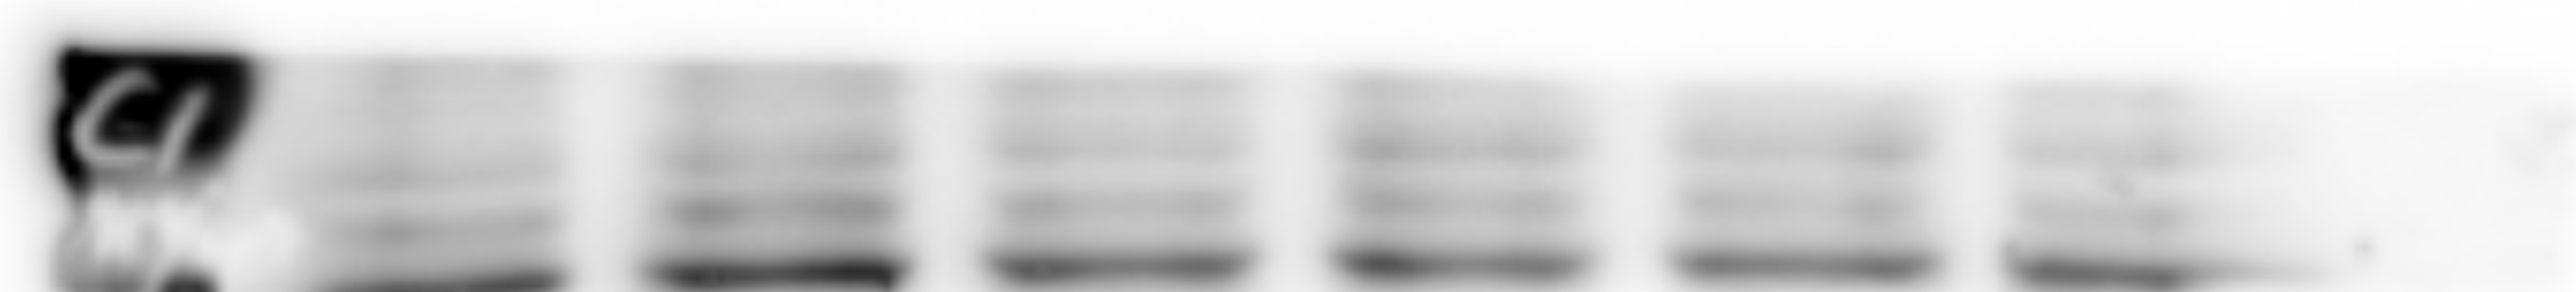

Supplement: fig5-data2 [file elife-86827-fig5-data2-v1.zip]

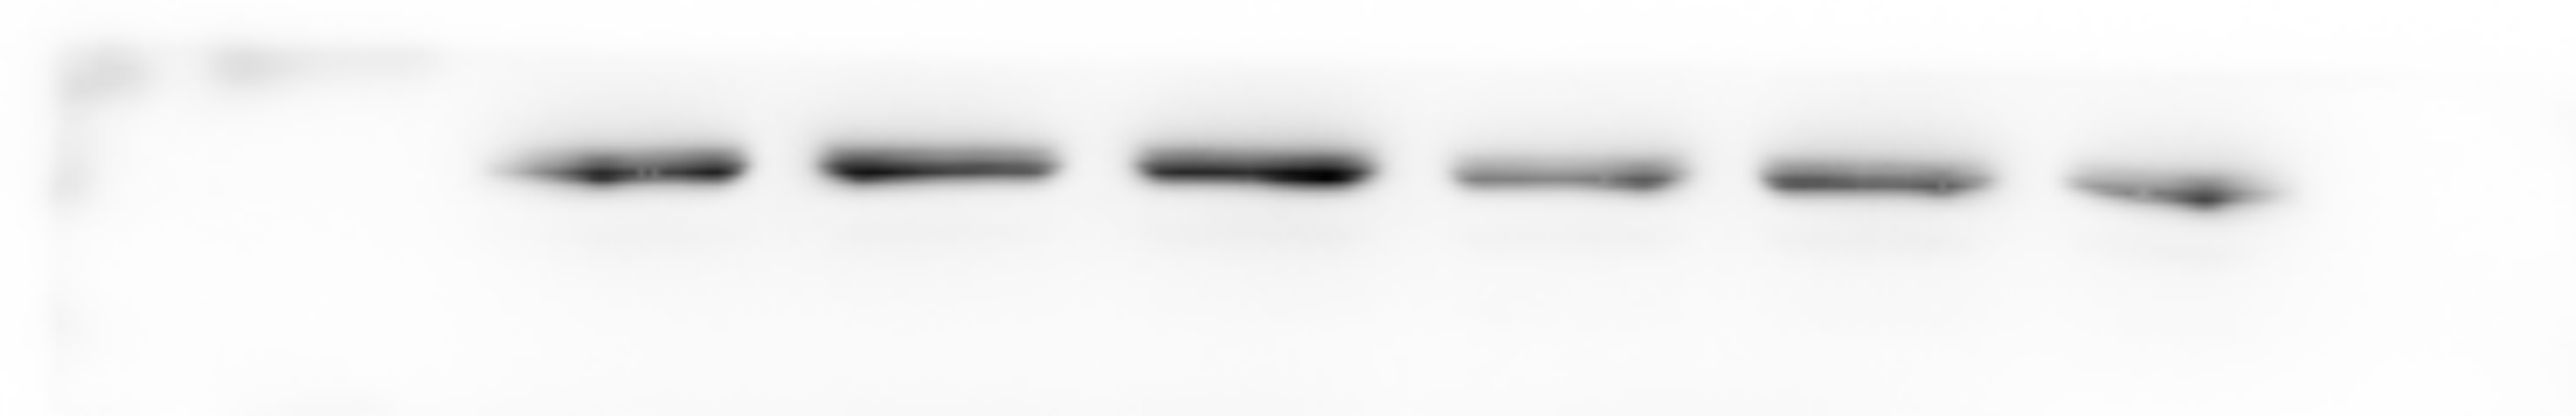

Supplement: fig5-data2 [file elife-86827-fig5-data2-v1.zip]

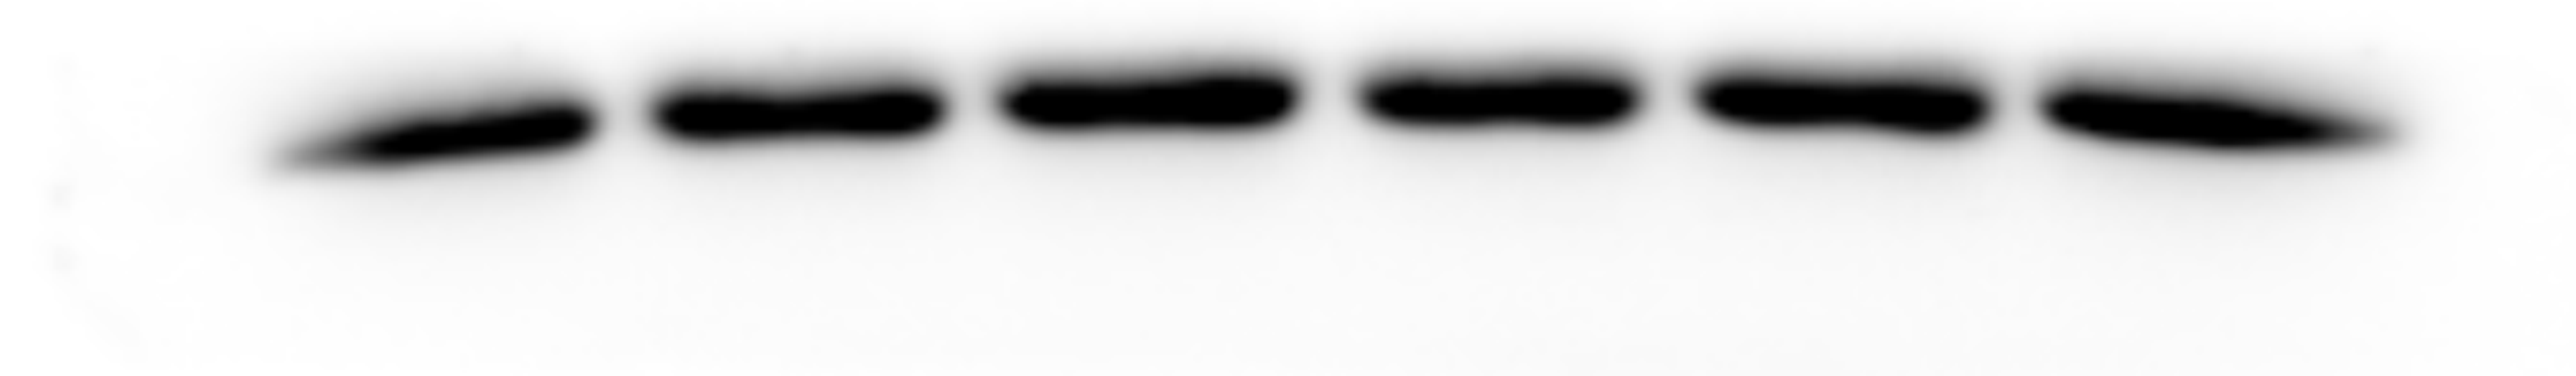

Supplement: fig5-data2 [file elife-86827-fig5-data2-v1.zip]

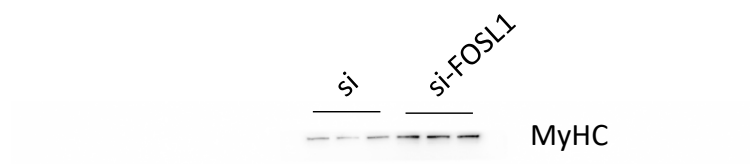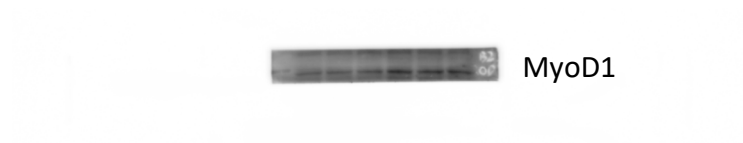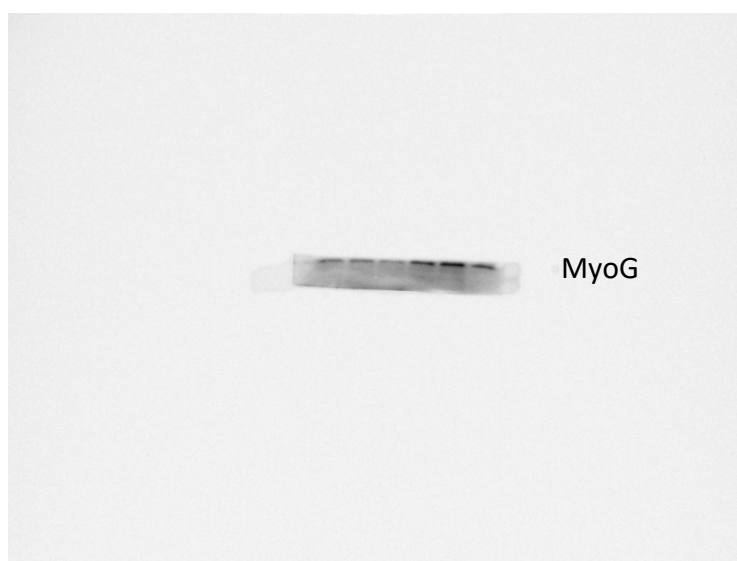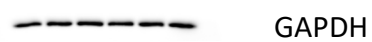

Supplement: fig6-data1 [file elife-86827-fig6-data1-v1.zip]

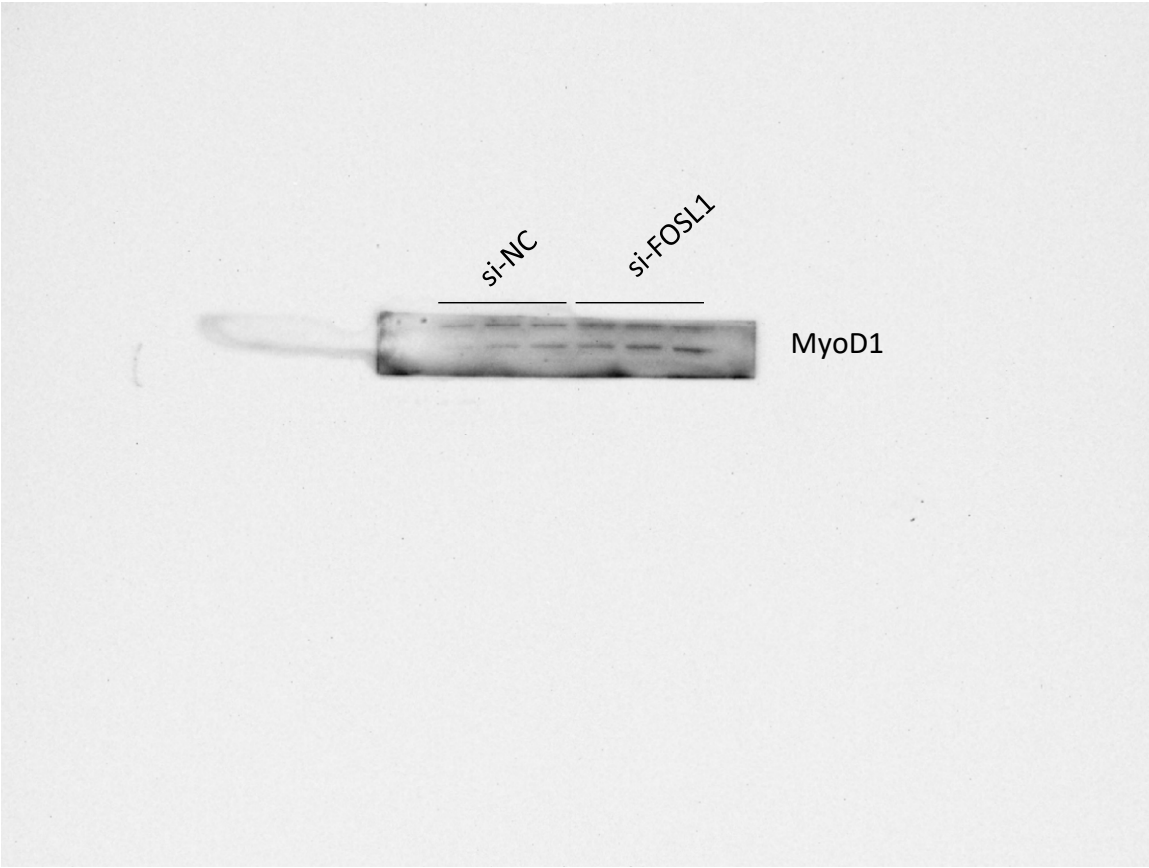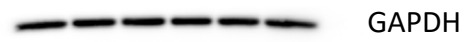

Supplement: fig6-data1 [file elife-86827-fig6-data1-v1.zip]

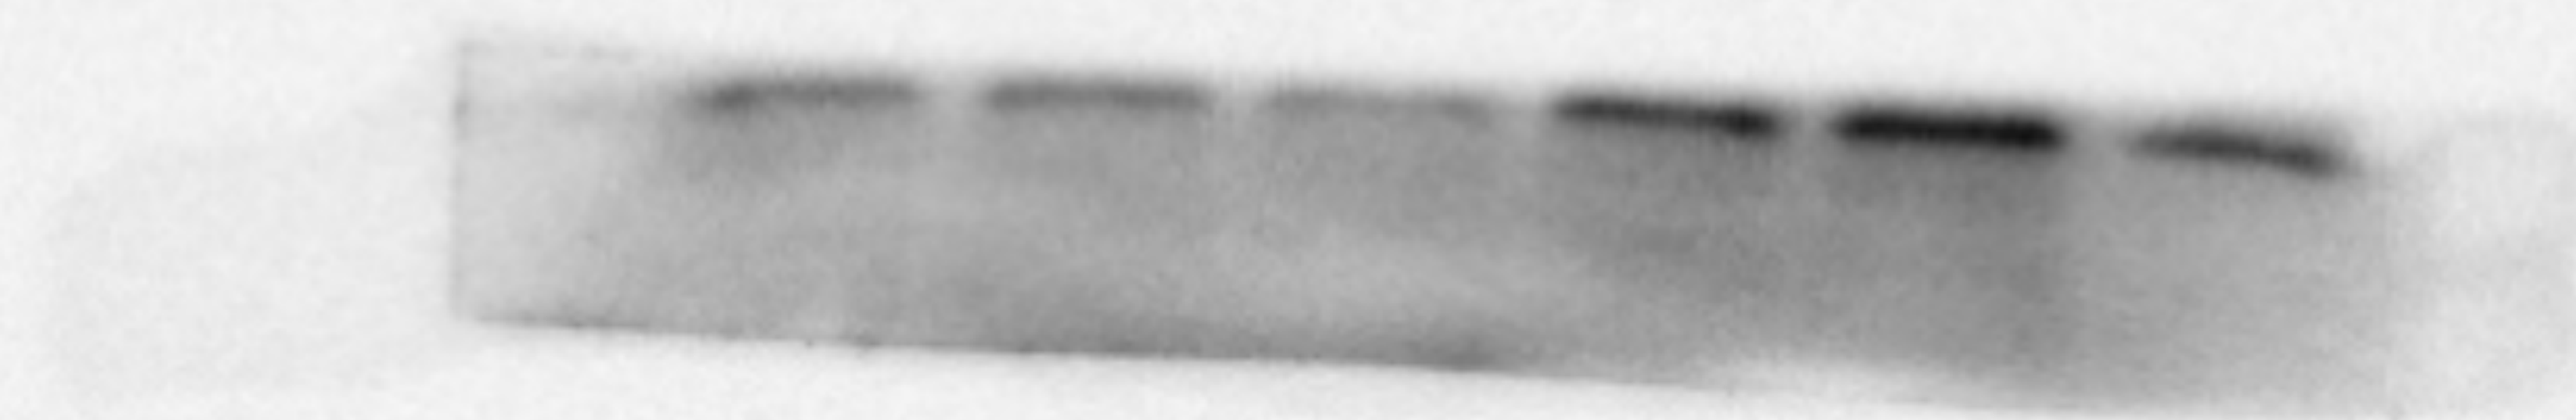

Supplement: fig6-data2 [file elife-86827-fig6-data2-v1.zip]

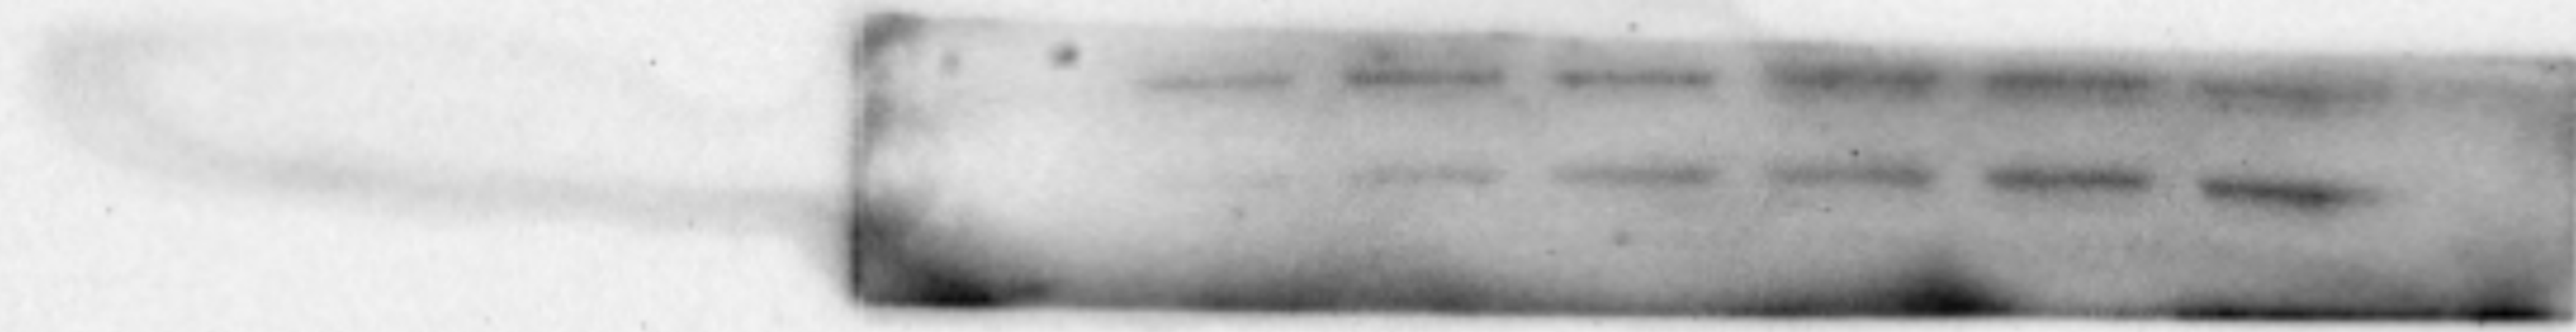

Supplement: fig6-data2 [file elife-86827-fig6-data2-v1.zip]

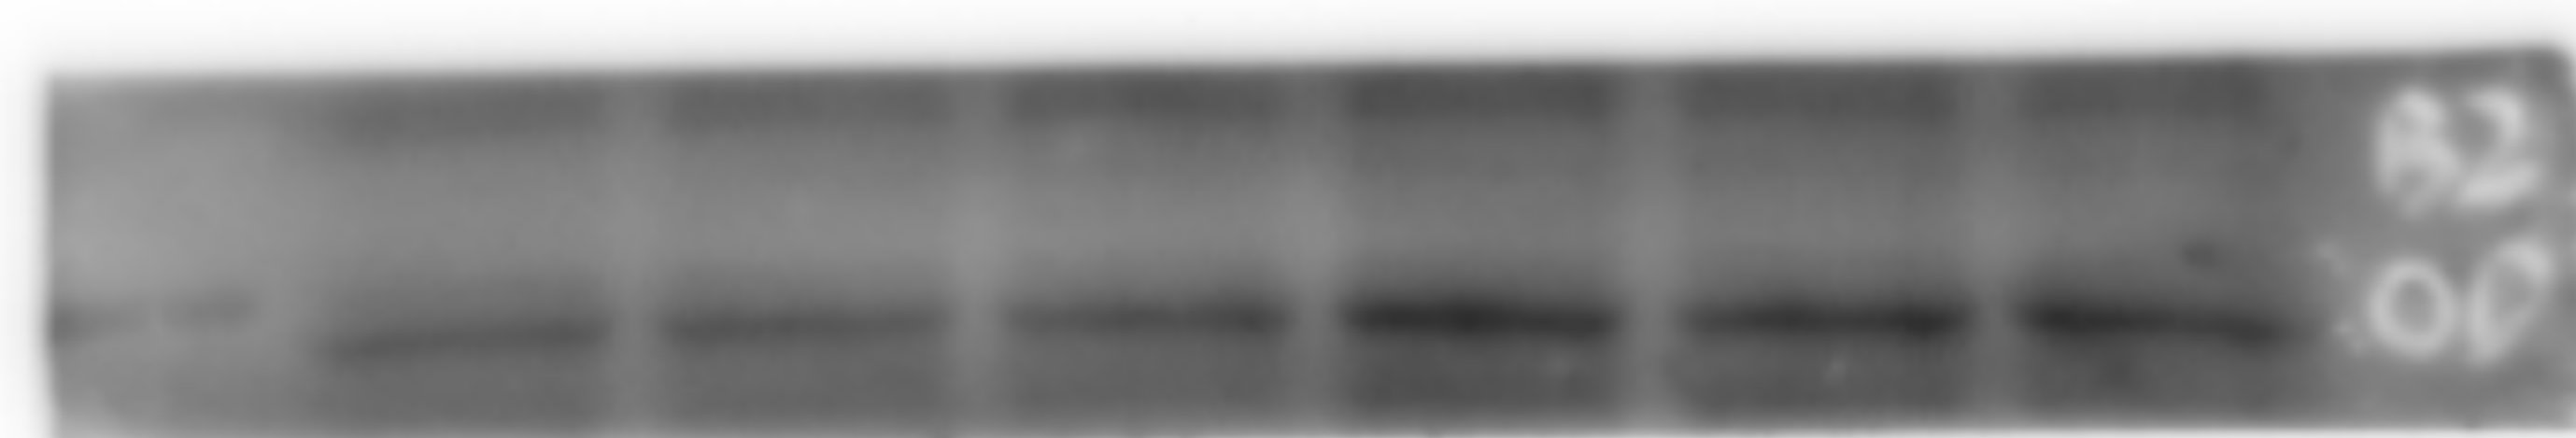

Supplement: fig6-data2 [file elife-86827-fig6-data2-v1.zip]

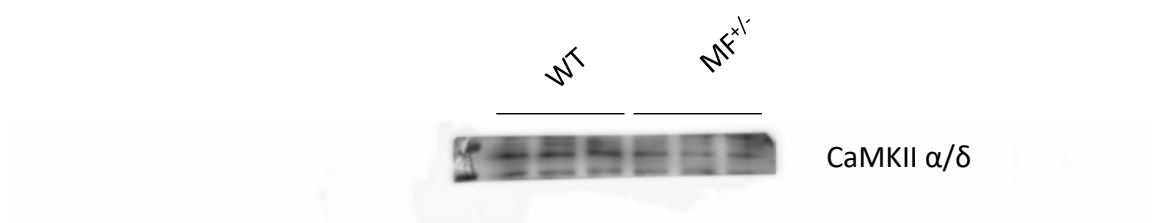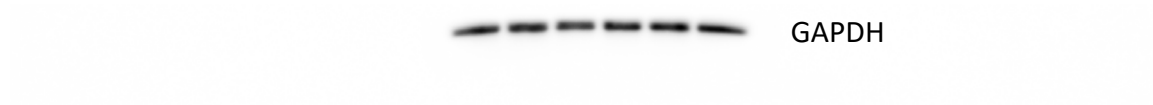

Supplement: fig8-data1 [file elife-86827-fig8-data1-v1.zip]

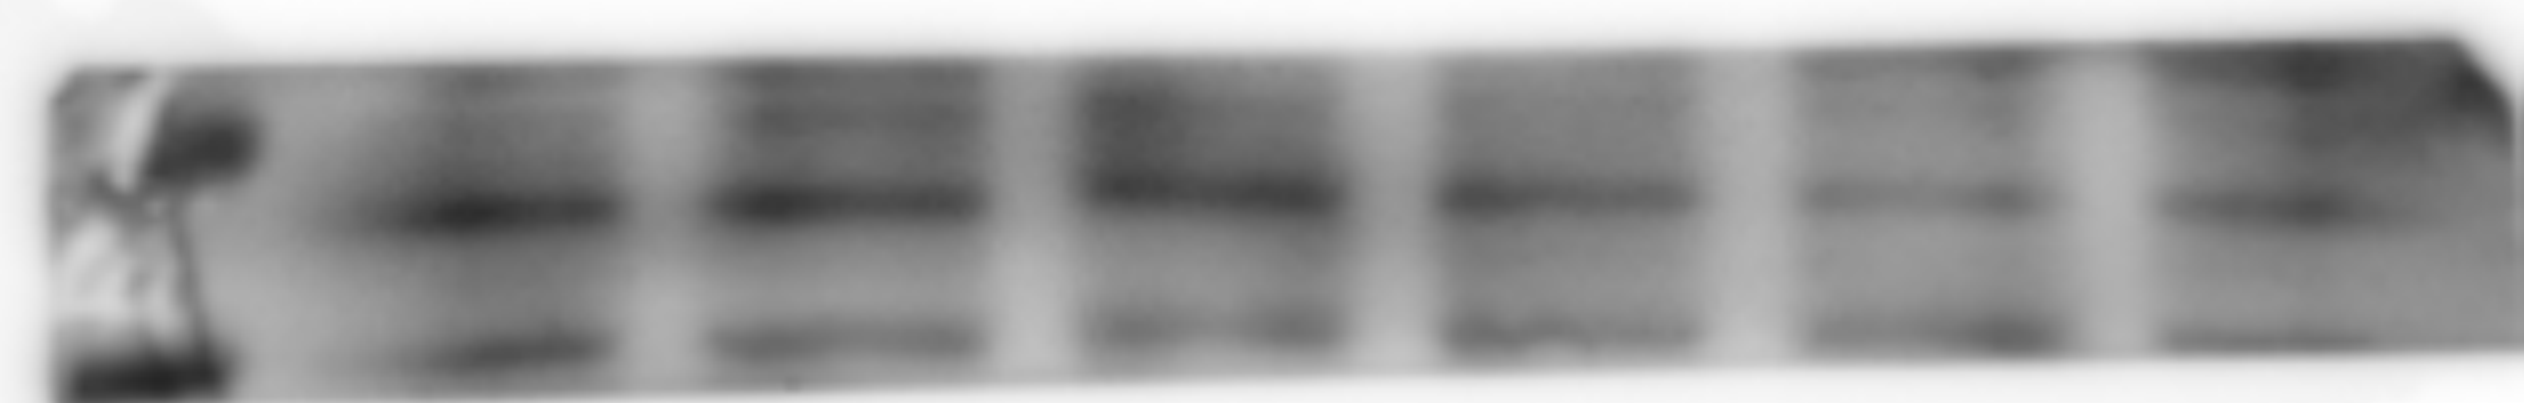

Supplement: fig8-data2 [file elife-86827-fig8-data2-v1.zip]
